# Supplementary material
Source: HighWire-hosted journal article supplement (https://gut.bmj.com/content/67/10/1870)
Supplement: inline-supplementary-material-2 [file inline-supplementary-material-2.pdf]

**Supplementary Table 1. Bacteria and fungi isolated in patients with AD and ACLF**

|                                          | AD | ACLF |
|------------------------------------------|----|------|
| <b>Total isolated GNB (n)</b>            |    |      |
| <i>Escherichia coli</i>                  | 14 | 48   |
| <i>Klebsiella pneumoniae</i>             | 1  | 13   |
| <i>Klebsiella oxytoca</i>                | 0  | 2    |
| <i>Enterobacter spp.</i>                 | 1  | 7    |
| <i>Serratia spp.</i>                     | 1  | 1    |
| <i>Pseudomonas aeruginosa</i>            | 0  | 1    |
| <i>Acinetobacter baumannii</i>           | 0  | 1    |
| <i>Bacteroides fragilis</i>              | 0  | 1    |
| Other GNB                                | 0  | 2    |
| <b>Total isolated GPC (n)</b>            |    |      |
| <i>Enterococcus faecalis</i>             | 5  | 13   |
| <i>Staphylococcus aureus</i>             | 3  | 18   |
| <i>Enterococcus faecium</i>              | 2  | 6    |
| <i>Staphylococcus warnerii</i>           | 1  | 0    |
| <i>Staphylococcus epidermidis</i>        | 1  | 6    |
| <i>Streptococcus pneumoniae</i>          | 2  | 3    |
| <i>Streptococcus viridans</i>            | 4  | 2    |
| <i>Streptococcus agalactiae</i>          | 0  | 2    |
| <i>Streptococcus pyogenes</i>            | 1  | 0    |
| <i>Enterococcus casseliflavus</i>        | 0  | 1    |
| <i>Enterococcus gallinarum</i>           | 0  | 1    |
| Other GPC                                | 1  | 2    |
| <b>Other organisms (n)</b>               |    |      |
| Anaerobic flora                          | 1  | 0    |
| <i>Propionibacterium (contamination)</i> | 0  | 1    |
| <i>Haemophilus influenza</i>             | 0  | 1    |
| <i>Clostridium difficile</i>             | 2  | 1    |
| <i>Corynebacterium</i>                   | 1  | 0    |
| <b>Fungi (n)</b>                         |    |      |
| <i>Aspergillus fumigatus</i>             | 0  | 1    |
| <i>Candida (undefined spp)</i>           | 0  | 6    |
| <i>Candida albicans</i>                  | 1  | 6    |
| <i>Candida tropicalis</i>                | 0  | 2    |
| <i>Candida glabrata</i>                  | 0  | 1    |
| <i>Candida Kefyr</i>                     | 0  | 1    |

AD: Acute decompensation, GNB: gram-negative bacilli; GPC: gram-positive cocci
