# Supplementary material
Source: HighWire-hosted journal article supplement (https://gut.bmj.com/content/67/10/1870)
Supplement: inline-supplementary-material-4 [file inline-supplementary-material-4.pdf]

**Supplementary Table 3. Clinical and laboratory data at ACLF diagnosis, clinical course, and mortality in patients with and without proved bacterial infection at diagnosis or during follow-up#**

|                                         | Proved bacterial infection at ACLF diagnosis (n=136) | No proved bacterial infection at ACLF diagnosis (n=271) | Proved bacterial infection during follow-up## (n=99) | No proved bacterial infection during follow-up## (n=156) |
|-----------------------------------------|------------------------------------------------------|---------------------------------------------------------|------------------------------------------------------|----------------------------------------------------------|
| <b>Cause of admission</b>               |                                                      |                                                         |                                                      |                                                          |
| GI Bleeding                             | 5(6.8)                                               | 28(19.7)*                                               | 11(20.8)                                             | 15(19.0)                                                 |
| Infection                               | 28(37.8)                                             | 28(19.7)**                                              | 16(30.2)                                             | 9(11.4)**                                                |
| Encephalopathy                          | 9(12.2)                                              | 34(23.9)                                                | 15(28.3)                                             | 15(22.8)                                                 |
| HRS                                     | 1(1.4)                                               | 8(5.6)                                                  | 0(0.0)                                               | 7(8.9)                                                   |
| Ascites                                 | 16(21.6)                                             | 30(21.1)                                                | 7(13.2)                                              | 20(25.3)                                                 |
| Other                                   | 15(20.3)                                             | 14(9.9)*                                                | 4(7.6)                                               | 10(12.7)                                                 |
| <b>Clinical and laboratory data</b>     |                                                      |                                                         |                                                      |                                                          |
| Age (years)                             | 56±12                                                | 56±11                                                   | 54±11                                                | 57±11                                                    |
| Alcoholic cirrhosis (%)                 | 70(52.2)                                             | 158(61.7)                                               | 56(61.5)                                             | 92(61.3)                                                 |
| No prior decompensation (%)             | 40(30.8)                                             | 56(22.1)                                                | 23(24.2)                                             | 30(21.0)                                                 |
| Ascites with surrogates (%)             | 132(97.1)                                            | 267(98.5)                                               | 98(99.0)                                             | 154(98.7)                                                |
| Encephalopathy (%)                      | 75(62.0)                                             | 119(50.4)*                                              | 52(59.1)                                             | 59(44.4)*                                                |
| WBC (x10 <sup>9</sup> /L)               | 9.6(6.0-15.1)                                        | 6.9(4.9-12.1)**                                         | 7.5(5.0-13.2)                                        | 6.5(4.6-10.8)                                            |
| Serum CRP (mg/L)                        | 36(21-78)                                            | 25(11-48)***                                            | 30(16-51)                                            | 20(9-42)*                                                |
| Serum bilirubin (mg/dL)                 | 6.0(3.0-13.7)                                        | 8.8(2.7-19.8)                                           | 11.0(2.5-22.1)                                       | 7.7(2.6-17.0)                                            |
| INR                                     | 1.9(1.5-2.7)                                         | 1.9(1.5-2.6)                                            | 2.0(1.5-2.5)                                         | 1.8(1.4-2.6)                                             |
| Serum creatinine (mg/dL)                | 1.7(1.0-2.5)                                         | 1.9(1.0-2.6)                                            | 2.0(1.1-3.0)                                         | 1.8(0.9-2.4)                                             |
| Plasma sodium (mEq/L)                   | 134±7                                                | 135±6                                                   | 135±6                                                | 134±6                                                    |
| Serum albumin                           | 2.8(2.4-3.1)                                         | 2.9(2.5-3.4)                                            | 2.9(2.6-3.3)                                         | 2.9(2.4-3.5)                                             |
| Renal failure (%)                       | 64(51.6)                                             | 120(51.3)                                               | 46(54.1)                                             | 66(48.9)                                                 |
| Cerebral failure (%)                    | 38(31.2)                                             | 42(17.9)**                                              | 22(25.3)                                             | 1.6(11.9)*                                               |
| Respiratory failure (%)                 | 22(20.2)                                             | 21(11.1)*                                               | 12(17.4)                                             | 6(5.6)*                                                  |
| Circulatory failure (%)                 | 39(33.1)                                             | 45(19.5)**                                              | 15(18.1)                                             | 24(17.9)                                                 |
| Coagulation failure (%)                 | 44(37.0)                                             | 73(32.2)                                                | 22(26.8)                                             | 43(32.8)                                                 |
| Liver failure (%)                       | 40(32.8)                                             | 101(43.5)*                                              | 38(45.2)                                             | 55(41.4)                                                 |
| MELD score                              | 28±7                                                 | 28±7                                                    | 28±7                                                 | 27±7                                                     |
| CLIF-C ACLF score                       | 53±10                                                | 49±9***                                                 | 50±8                                                 | 47±9                                                     |
| NASCELD criteria for ACLF\$             | 21(15.4)                                             | 23(8.5)*                                                | 14(14.1)                                             | 8(5.1)*                                                  |
| ACLF-1(%)                               | 67(49.3)                                             | 137(50.6)                                               | 43(43.4)                                             | 90(57.7)**                                               |
| ACLF-2(%)                               | 45(33.1)                                             | 102(37.6)                                               | 38(38.4)                                             | 57(36.5)                                                 |
| ACLF-3(%)                               | 24(17.6)                                             | 32(11.8)                                                | 18(18.2)                                             | 9(5.8)                                                   |
| <b>Inflammatory cytokines</b>           |                                                      |                                                         |                                                      |                                                          |
| TNF (pg/ml)                             | 39(27-55)                                            | 29(17-39)***                                            | 29(17-42)                                            | 27(17-36)                                                |
| IL-6 (pg/ml)                            | 120(43-557)                                          | 30(13-87)***                                            | 32(13-98)                                            | 27(12-48)                                                |
| IL-8 (pg/ml)                            | 119(68-292)                                          | 77(38-165)**                                            | 84(41-147)                                           | 70(33-174)                                               |
| IL-10 (pg/ml)                           | 18(6-77)                                             | 7(2-20)**                                               | 7(2-34)                                              | 5(1-15)*                                                 |
| IL-1ra (pg/ml)                          | 42(20-110)                                           | 16(8-43)***                                             | 24(10-57)                                            | 14(7-32)                                                 |
| <b>Albumin oxidation fractions&amp;</b> |                                                      |                                                         |                                                      |                                                          |
| HMA (%)                                 | 41(29-55)                                            | 46(34-58)                                               | 46(34-59)                                            | 46(34-56)                                                |
| HNA1+HNA2 (%)                           | 57(42-69)                                            | 52(41-65)                                               | 51(40-64)                                            | 52(42-65)                                                |
| HNA2 (%)                                | 10(7-17)                                             | 11(7-15)                                                | 11(7-17)                                             | 9(5-13)                                                  |
| <b>Critical care (28-d)</b>             |                                                      |                                                         |                                                      |                                                          |
| ICU                                     | 85(62.5)                                             | 122(45.0)***                                            | 55(55.6)                                             | 57(36.5)**                                               |
| Mechanical ventilation                  | 54(39.7)                                             | 60(22.1)***                                             | 35(35.4)                                             | 21(13.5)***                                              |
| Renal replacement therapy               | 48(35.3)                                             | 58(21.4)**                                              | 26(26.3)                                             | 29(7-32)                                                 |
| NASCELD criteria for ACLF\$             | 58(42.7)                                             | 68(25.1)***                                             | 39(39.4)                                             | 24(15.4)***                                              |
| <b>Clinical course of ACLF</b>          |                                                      |                                                         |                                                      |                                                          |
| No ACLF or ACLF-1 at final assessment   | 68(52.7)                                             | 157(63.0)                                               | 56(59.0)                                             | 95(68.8)                                                 |
| ACLF 2-3 at final assessment            | 61(47.3)                                             | 92(37.0)                                                | 39(41.1)                                             | 43(31.2)                                                 |
| <b>28-day transplant free mortality</b> |                                                      |                                                         |                                                      |                                                          |
|                                         | 47(34.6)                                             | 78(28.8)                                                | 34(34.3)                                             | 37(23.7)                                                 |
| <b>90-day transplant free mortality</b> |                                                      |                                                         |                                                      |                                                          |
|                                         | 69(50.7)                                             | 106(39.1)*                                              | 48(48.5)                                             | 50(32.1)**                                               |

# Patients are divided in two groups: A: patients with and without proved bacterial infections at diagnosis of ACLF, B: patients with ACLF without proved bacterial infections at diagnosis who did and did not develop proved bacterial infections during follow-up.

## Patients with ACLF and proved bacterial infection at diagnosis of the syndrome were excluded from this analysis

\$: two or more of the following vasopressors, renal replacement therapy, mechanical ventilation, grade 3-4 hepatic encephalopathy

&: According to the redox state at cysteine 34

\*P-value<0.05; \*\*P-value<0.01; \*\*\*P-value<0.001

**Supplementary Table 4. Clinical and laboratory data at ACLF diagnosis, clinical course, and mortality of patients with AD who developed ACLF during follow-up that was triggered and not triggered by infection**

|                                         | Bacterial infection<br>at ACLF diagnosis<br>(n=57) | No bacterial infection<br>at ACLF diagnosis<br>(n=58) |
|-----------------------------------------|----------------------------------------------------|-------------------------------------------------------|
| <b>Clinical and analytical data</b>     |                                                    |                                                       |
| Age (years)                             | 54±13                                              | 58±11                                                 |
| Alcoholic cirrhosis (%)                 | 28(50.0)                                           | 29(54.7)                                              |
| No prior decompensation (%)             | 20(35.7)                                           | 12(22.6)                                              |
| Ascites with surrogates (%)             | 54(94.7)                                           | 58(100.0)                                             |
| Encephalopathy (%)                      | 31(55.4)                                           | 27(46.6)                                              |
| WBC (x10 <sup>9</sup> /L)               | 9.8(5.6-13.2)                                      | 6.5(4.5-11.4)                                         |
| Serum CRP (mg/L)                        | 34(19-56)                                          | 19(8-38)**                                            |
| Serum bilirubin (mg/dL)                 | 5.1(2.4-9.0)                                       | 5.7(2.8-13.3)                                         |
| INR                                     | 1.9(1.5-2.7)                                       | 1.8(1.4-2.3)                                          |
| Serum creatinine (mg/dL)                | 1.6(1.0-2.2)                                       | 1.7(0.8-2.1)                                          |
| Plasma sodium (mEq/L)                   | 133±8                                              | 135±7                                                 |
| Serum albumin                           | 2.8(2.4-3.1)                                       | 3.0(2.2-3.5)                                          |
| Renal failure (%)                       | 23(40.4)                                           | 25(43.1)                                              |
| Cerebral failure (%)                    | 13(23.6)                                           | 7(12.1)                                               |
| Respiratory failure (%)                 | 11(22.5)                                           | 6(13.3)                                               |
| Circulatory failure (%)                 | 15(27.8)                                           | 10(17.2)                                              |
| Coagulation failure (%)                 | 18(32.7)                                           | 16(28.1)                                              |
| Liver failure (%)                       | 9(16.1)                                            | 18(31.6)                                              |
| MELD score                              | 25±7                                               | 25±7                                                  |
| CLIF-C ACLF score                       | 49±8                                               | 47±9                                                  |
| NASCELD criteria for ACLF\$             | 3(5.3)                                             | 0(0.0)                                                |
| ACLF-1(%)                               | 31(54.4)                                           | 35(60.3)                                              |
| ACLF-2(%)                               | 19(33.3)                                           | 21(36.2)                                              |
| ACLF-3(%)                               | 7(12.3)                                            | 2(3.5)                                                |
| <b>Inflammatory cytokines</b>           |                                                    |                                                       |
| TNF (pg/ml)                             | 38(23-48)                                          | 29(16-38)                                             |
| IL-6 (pg/ml)                            | 840(30-1119)                                       | 22(12-48)                                             |
| IL-8 (pg/ml)                            | 146(93-659)                                        | 57(30-117)*                                           |
| IL-10 (pg/ml)                           | 18(6-151)                                          | 8(1-14)                                               |
| IL-1ra (pg/ml)                          | 21(5-64)                                           | 21(8-42)                                              |
| <b>Need for critical care (28-d)</b>    |                                                    |                                                       |
| ICU                                     | 36(63.2)                                           | 24(41.4)*                                             |
| Mechanical ventilation                  | 25(43.9)                                           | 8(13.8)***                                            |
| Renal replacement therapy               | 15(26.3)                                           | 9(15.5)                                               |
| NASCELD criteria for ACLF\$             | 24(42.1)                                           | 9(15.5)**                                             |
| <b>Clinical course and mortality</b>    |                                                    |                                                       |
| No ACLF or ACLF-1 at final assessment   | 29(55.8)                                           | 33(73.3)                                              |
| ACLF 2-3 at final assessment            | 23(44.2)                                           | 12(26.7)                                              |
| <b>28-day transplant free mortality</b> | 19(33.3)                                           | 10(17.2)*                                             |
| <b>90-day transplant free mortality</b> | 31(54.4)                                           | 15(25.9)**                                            |

& According to the redox state at cysteine 34; \$: two or more of the following vasopressors, renal replacement therapy, mechanical ventilation, grade 3-4 hepatic encephalopathy

\*P-value<0.05; \*\*P-value<0.01; \*\*\*P-value<0.001
